# Supplementary material
Source: PubMed Central journal article supplement (PMC3488835)

## Supplementary material:

**Table 1:** Comparison of docking energy between ZINC00004165 and first line anti tuberculosis compounds.

|              | Autodock4.0   | Gemdockv2.0   |
|--------------|---------------|---------------|
| Compound     | DE (kcal/mol) | Fitness value |
| ZINC00004165 | -9.80         | -113.255      |
| ZINC04440911 | -9.06         | -109.309      |
| Streptomycin | -8.19         | -82.228       |
| rifampicin   | -8.00         | -89.819       |
| Ethambutol   | -5.84         | -54.669       |
| Isoniazid    | -4.53         | -47.178       |
| Pyrazinamide | -4.18         | -49.158       |

**Table 2:** Comparison of Drug likeness properties of the selected ZINC compound ZINC00004165 and first line anti tuberculosis drugs

| Molecular Properties |              |              |              |            |            |           |              |
|----------------------|--------------|--------------|--------------|------------|------------|-----------|--------------|
| Parameter            | ZINC00004165 | ZINC04440911 | Streptomycin | Rifampicin | Ethambutol | Isoniazid | Pyrazinamide |
| miLogP               | 0.137        | -2.417       | -5.35        | 2.096      | 0.35       | -0.969    | -0.711       |
| TPSA                 | 67.535       | 99.104       | 336.45       | 216.662    | 64.51      | 68.013    | 68.878       |
| atoms                | 25           | 37           | 40           | 59         | 14         | 10        | 9            |
| MW                   | 333.371      | 523.566      | 581.58       | 822.953    | 204.314    | 137.142   | 123.115      |
| nON                  | 6            | 9            | 19           | 16         | 4          | 4         | 4            |
| nOHNH                | 0            | 1            | 16           | 6          | 4          | 3         | 2            |
| nviolations          | 0            | 1            | 3            | 3          | 0          | 0         | 0            |
| nrotb                | 5            | 6            | 9            | 5          | 9          | 1         | 1            |
| volume               | 297.461      | 435.502      | 497.249      | 756.019    | 221.064    | 122.562   | 106.003      |

  

| Drug Likness            |              |              |              |            |            |           |              |
|-------------------------|--------------|--------------|--------------|------------|------------|-----------|--------------|
| Parameter               | ZINC00004165 | ZINC04440911 | Streptomycin | rifampicin | Ethambutol | Isoniazid | Pyrazinamide |
| GPCR ligand             | -1.44        | -0.17        | -0.67        | -3.59      | 0.21       | -1.37     | -1.51        |
| Ion channel modulator   | -0.66        | -0.4         | -1.15        | -4.65      | 0.07       | -1.53     | -1.64        |
| Kinase inhibitor        | -1.56        | -0.16        | -0.76        | -4.33      | -0.27      | -0.67     | -2.14        |
| Nuclear receptor ligand | -1.89        | -0.85        | -1.11        | -4.55      | -0.9       | -2.56     | -3.29        |

**Graph 1:** The distribution of Z score analysis of the compounds for finding of best compound with unique results. The compound ZINC00004165 produced Z score of -2.681 and located at one side tail of the histogram.

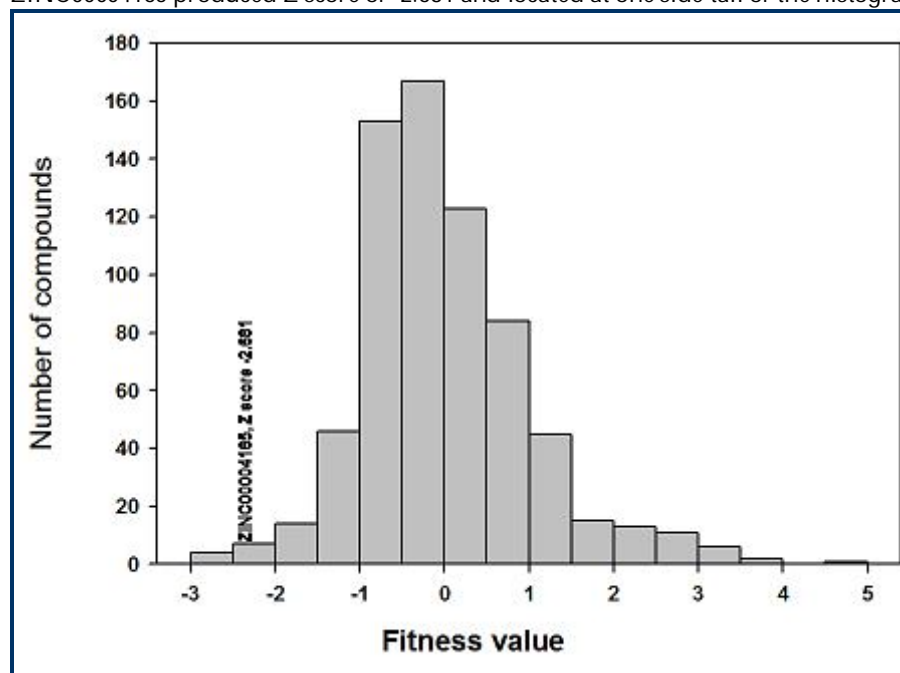

**Graph 2:** It represents the normal distribution analysis of the Z scores with respect to their probabilities of distribution of the compounds fitness values. The P value distributes on the Y axis and the Z score is on X axis. The compound ZINC00004165 shows Z score of -2.681 with P value of 0.003.

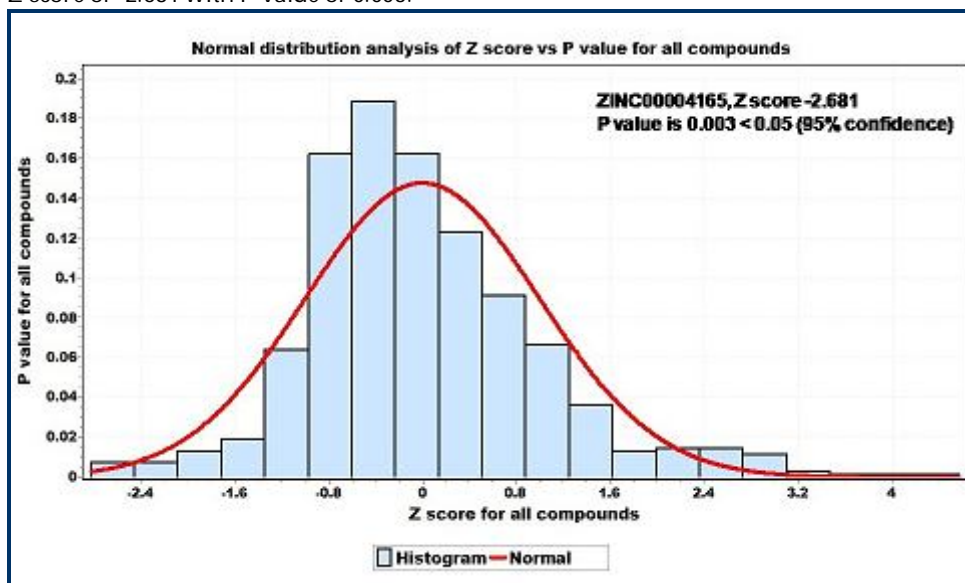

Supplement: 97320630008931S1.pdf [file 97320630008931S1.pdf]
